# Supplementary material for: Influence of Technological Factors on the Quality of Chitosan Microcapsules with Boswellia serata L. Essential Oil
Source: MDPI journal article supplement (doi:10.3390/pharmaceutics14061259), 2022-06-13
Supplement: s1 [file s1]

**Table S1.** Composition of *Boswellia serrata* essential oil obtained by GC-MS

| No. | Compounds                                                  | Retention time, min | Composition, % |
|-----|------------------------------------------------------------|---------------------|----------------|
| 1.  | Alpha-phellandrene                                         | 8.358               | 25.41          |
| 2.  | Tricyclo[3.1.1.0 <sup>3,6</sup> ]heptane-6-carboxylic acid | 8.383               | 6.00           |
| 3.  | Alpha-Pinene                                               | 8.782               | 46.90          |
| 4.  | 7-(prop-2-yl)cyclohepta-1,3,5-trie                         | 9.060               | 0.08           |
| 5.  | 2,2-dimethyl-3-methylene-bicyclo [2.2.1]hep                | 9.150               | 0.02           |
| 6.  | Sabinene                                                   | 10.600              | 4.17           |
| 7.  | 1,6-Octadiene, 7-methyl-3-methylene-                       | 11.678              | 1.42           |
| 8.  | 1,3-Cyclohexadiene, 2-methyl-5-(1-methylet                 | 12.196              | 0.23           |
| 9.  | 1,3,6-Octatriene, 3,7-dimethyl-, (E)-                      | 12.611              | 1.78           |
| 10. | 1,3-Cyclohexadiene, 1-methyl-4-(1-methylet                 | 12.904              | 0.06           |
| 11. | Benzene, methyl(1-methylethyl)-                            | 13.541              | 1.71           |
| 12. | Limonene                                                   | 13.839              | 2.73           |
| 13. | 1,3,6-Octatriene, 3,7-dimethyl-, (E)-                      | 14.444              | 0.07           |
| 14. | Bicyclo[3.1.0]hex-3-en-2-ol, 2-methyl-5-(1-                | 14.985              | 0.16           |
| 15. | 1-isopropyl-4-methyl-1,4-cyclo                             | 15.580              | 0.17           |
| 16. | 4-Thujanol                                                 | 16.117              | 0.08           |
| 17. | 1-methyl-4-(1-methylethylidene)                            | 17.402              | 0.05           |
| 18. | 2-Oxabicyclo[2.2.2]octane, 1,3,3-trimethyl-                | 18.139              | 0.11           |
| 19. | 1,6-octadien-3-ol, 3,7-dimethyl-                           | 18.504              | 0.10           |
| 20. | 1-isopropyl-4-methylbicyclo                                | 19.253              | 0.34           |
| 21. | 4,7,7-trimethylbicyclo[4.1.0]hept-                         | 19.715              | 0.12           |
| 22. | 4(10)-Thujen-3-ol, stereoisomer                            | 20.974              | 0.10           |
| 23. | 2-Pinen-4-ol                                               | 21.255              | 0.06           |
| 24. | 4(10)-Thujen-3-ol, stereoisomer                            | 23.228              | 0.23           |
| 25. | 3-Cyclohexen-1-ol, 4-methyl-1-(1-methyleth                 | 23.545              | 1.00           |
| 26. | Benzenemethanol, alpha, alpha,4-trimethyl                  | 24.309              | 0.04           |
| 27. | 3-Cyclohexene-1-methanol, alpha, alpha,4-                  | 24.536              | 0.07           |
| 28. | Anisole                                                    | 25.120              | 2.16           |
| 29. | Cyclohexanol, 2-methyl-5-(1-methylethenyl)                 | 28.521              | 0.03           |
| 30. | linalyl acetate                                            | 28.911              | 0.05           |
| 31. | 1,2,3-Trimethyl-cyclopent-2-enecarboxaldeh                 | 29.727              | 0.03           |
| 32. | 3-Cyclohexene-1-methanol, alpha, alpha,4-                  | 34.808              | 0.06           |
| 33. | Copaene                                                    | 36.227              | 0.11           |
| 34. | Beta-bourbonene                                            | 36.849              | 0.75           |
| 35. | Bicyclo[7.2.0]undec-4-ene, 4,11,11-trimethyl               | 37.554              | 0.09           |
| 36. | Benzene, 1,2-dimethoxy-4-(2-propenyl)-                     | 38.690              | 0.32           |
| 37. | 1,6-Cyclodecadiene, 1-methyl-5-methylene-8                 | 38.844              | 0.06           |
| 38. | 1,6-Cyclodecadiene, 1-methyl-5-methylene-8                 | 39.480              | 0.06           |
| 39. | 2-Norpinene, 2,6-dimethyl-6-(4-methyl-3-pe                 | 40.102              | 0.06           |
| 40. | (S,1Z,6Z)-8-Isopropyl-1-methyl-5-methylene                 | 40.404              | 0.05           |
| 41. | 8-isopropyl-1-methyl-5-methyle                             | 42.697              | 0.21           |
| 42. | Bicyclo[7.2.0]undec-4-ene, 4,11,11-trimethyl               | 42.827              | 0.18           |
| 43. | Kessane                                                    | 45.404              | 0.51           |
| 44. | Cyclohexanemethanol, 4-ethenyl-alpha                       | 46.905              | 0.03           |
| 45. | Benzene, 1,2,3-trimethoxy-5-(2-propenyl)-                  | 47.793              | 0.23           |

|     |                           |        |      |
|-----|---------------------------|--------|------|
| 46. | Alpha-Phellandrene, dimer | 60.074 | 0.39 |
| 47. | Hexadecanal               | 61.559 | 0.05 |
| 48. | Camphorene <m->           | 69.737 | 0.09 |
| 49. | 9-Octadecenal             | 70.150 | 0.03 |
| 50. | 24-Norursa-3,12-diene     | 88.218 | 1.22 |

---
